# Supplementary material for: A novel approach for controlled oriented growth of non-polar m-plane ZnO thin films via low temperature chemical solution route
Source: Royal Society of Chemistry journal article supplement (doi:10.1039/c2ce26125a), 2012-01-01
Supplement: c2ce26125a.pdf [file c2ce26125a.pdf]

## Electronic Supplementary Information#

---

### **A novel approach for controlled oriented growth of non-polar *m*-plane ZnO thin films via low temperature chemical solution route**

M. Babar Shahzad,<sup>a</sup> Hong Lu,<sup>a</sup> Peng Wang,<sup>a</sup> Yang Qi<sup>\*a,b</sup>

<sup>a</sup>Institute of Materials Physics and Chemistry, School of Sciences, Northeastern  
University, Shenyang 110819, People's Republic of China

<sup>b</sup>Key Laboratory for Anisotropy and Texture of Materials, Ministry of Education,  
Northeastern University, Shenyang 110819, People's Republic of China

\* Corresponding author. Tel.: +86-24-83683674; fax: +86-24-83683674

E-mail address: qiyang@imp.neu.edu.cn

## Electronic Supplementary Information#

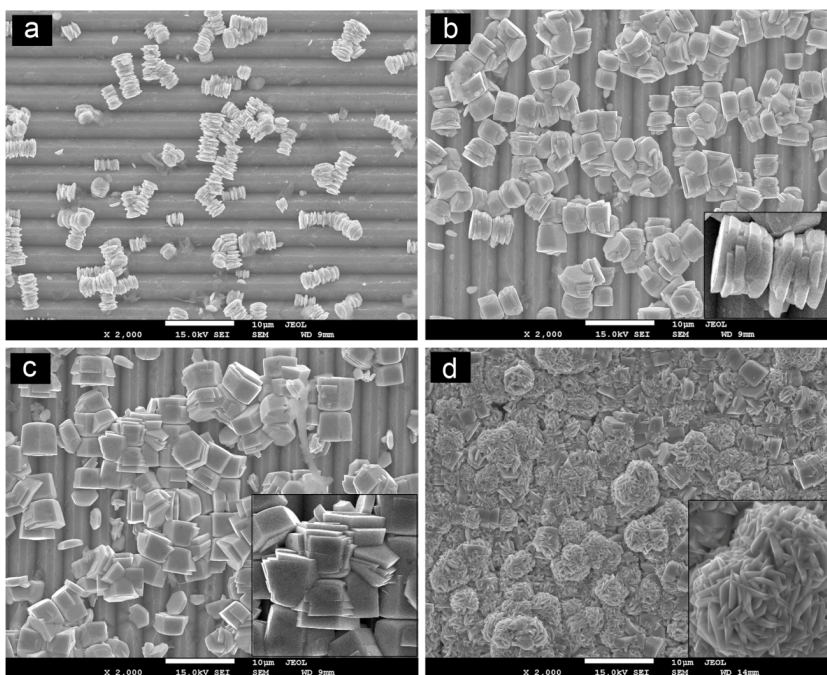

**Fig. S1** Low FESEM images of solution grown films at 85 °C after different reaction time (a) 1 h; (b) 2 h (inset showing a partially recrystallized twinned rod with neck-shape boundary at the concentric point); (c) 3 h (inset showing agglomeration and impinging of rods); (d) 4 h (inset showing a twinned rod completely covered with nano-plates forming 'flower like' structure)

## Electronic Supplementary Information#

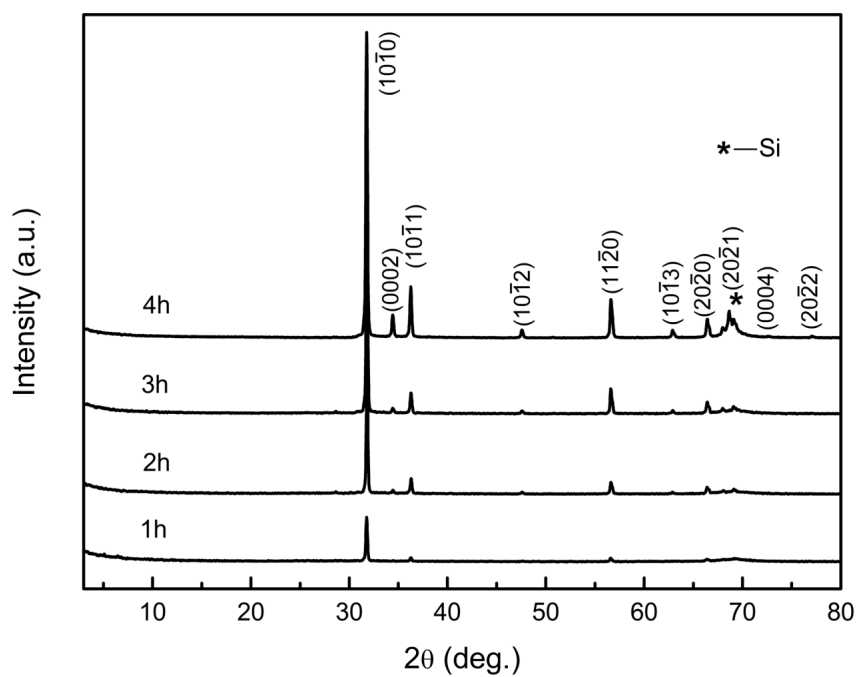

**Fig. S2** XRD patterns of 2<sup>nd</sup> step solution grown films at 85 °C after 1 h, 2 h, 3 h and 4 h reaction time
